# Supplementary material for: The impact of medical teleconsultations on general practitioner-patient communication during COVID- 19: A case study from Poland
Source: PLoS One. 2021 Jul 16;16(7):e0254960. doi: 10.1371/journal.pone.0254960 (PMC8284634; doi:10.1371/journal.pone.0254960)
Supplement: S1 Data — (XLSX) [file pone.0254960.s001.xlsx]

## Sheet: pilot study
	How often do you need to visit your health?	Waiting time for a consultation	Reason of the consultation	The GP listened carefully to what I had to say	The GP was patient and attentive	The GP treated me with kindness and respect	The GP understandably provided me with information about further diagnostic and treatment procedures	The GP gave comprehensive and clear answers to my questions	My GP supported me and understood my emotional needs	I believe the GP really cared about me and my health problems	I trust my GP and can give him even very personal information	I felt comfortable discussing my health problems with my GP over the phone or on the Internet	I believe that teleconsultation helps to ensure the security and confidentiality of my data as a patient	I believe that teleconsultation is an acceptable way to solve my health problem	I believe that teleconsultation saves time	I can easily use electronic medical records	I believe that the medical care I received during teleconsultation is as good as seeing my GP F2F	age	gender	marital status	education	professional activity
62	2	4	3	3	2	4	3	3	3	2	1	2	2	1	1	1	2	81	2	4	3	4
63	1	2	4	5	5	4	5	5	4	4	3	5	4	5	5	1	5	70	1	4	3	4
64	3	3	4	5	3	5	5	5	5	5	5	5	5	5	5	5	5	72	1	4	4	2
65	2	4	1	5	5	3	5	5	5	3	5	4	3	5	1	5	5	53	2	2	4	2
66	2	4	4	5	5	5	5	5	3	3	5	5	3	5	5	3	4	70	1	2	4	4
67	4	4	4	5	5	5	5	5	5	5	5	5	5	2	5	5	4	83	2	2	4	4
68	1	3	4	5	5	5	5	5	5	5	4	5	5	5	5	5	5	68	1	2	4	4
69	2	3	3	5	5	5	5	5	5	5	5	5	5	5	5	5	5	69	2	2	4	4
70	3	2	4	5	5	5	5	5	5	3	3	5	3	4	5	5	5	79	1	4	4	4
71	3	1	2	5	5	5	5	5	5	4	5	5	5	5	4	5	5	60	1	2	3	4
72	2	3	4	4	5	3	4	5	4	3	5	5	4	4	5	4	5	70	2	2	3	2
73	3	4	2	4	5	5	5	5	5	5	5	5	5	5	5	5	5	80	2	4	4	4
74	2	3	3	5	5	5	5	5	5	5	4	5	4	3	5	1	4	80	2	2	4	4
75	4	4	4	3	3	4	4	4	4	1	2	5	5	4	5	2	4	82	2	3	4	4
76	2	3	3	5	5	5	5	5	5	5	5	5	5	5	5	5	5	81	2	2	1	4
77	2	3	4	5	5	5	5	5	5	5	5	5	5	5	3	5	5	79	1	2	2	4
78	2	4	4	5	5	5	5	5	5	5	4	4	4	5	5	3	4	34	1	1	4	2
79	2	3	4	5	5	5	5	5	5	5	5	5	5	5	5	1	1	83	2	2	4	4
80	2	4	5	3	3	3	3	3	3	3	3	5	5	3	5	1	2	43	2	1	3	2
81	3	4	3	5	4	5	5	5	4	5	5	5	4	5	5	1	1	80	1	2	4	4
82	3	4	2	5	5	5	5	5	5	4	5	5	5	4	4	5	3	69	1	4	4	2
83	2	1	3	5	5	5	5	5	5	5	5	5	5	5	5	5	3	40	1	3	4	7
84	2	4	2	5	5	5	5	5	5	5	5	5	5	5	5	5	5	36	2	2	3	2
85	2	4	4	3	5	5	4	4	3	3	4	2	3	1	1	1	1	74	1	2	3	4
86	1	4	2	5	5	5	5	5	5	5	5	5	5	1	5	1	5	78	1	4	3	4
87	2	2	4	5	5	5	5	4	4	5	1	4	5	4	4	1	2	70	1	3	3	4
88	2	1	4	5	5	5	5	5	5	4	5	5	1	5	5	5	5	87	2	3	4	4
89	1	3	2	5	5	5	5	5	5	5		5	5	5	5	1	5	74	1	3	1	4
90	1	3	4	4	4	4	4	4	3	3	2	4	4	3	4	3	3	25	2	1	4	2
91	2	4	1	4	4	4	4	4	2	3	2	4	4	2	2	4	3	25	2	1	4	2
92	2	4	2	5	5	3	3	3	5	5	5	5	5	1	5	5	5	65	2	2	2	4
93	3	4	2	5	5	5	4	5	5	4	5	5	5	4	5	4	4	85	2	4	4	4
94	3	1	2	5	3	5	5	5	4	5	5	5	1	1	1	1	1	82	1	4	4	4
95	3	1	4	5	5	5	5	5	5	5	5	5	5	3	3	4	4	85	2	4	4	4
96	1	4	3	5	5	5	5	5	5	3	5	5	5	5	5	5	5	70	2	2	2	4
97	2	3	4	5	5	5	5	5	5	5	5	4	5	5	1	5	5	74	1	4	1	4
98	1	3	3	5	5	5	5	5	5	5	5	5	5	5	5	1	5	69	2	4	3	4
99	2	4	4	5	5	3	4	4	4	5	4	5	4	4	5	4	5	77	1	4	2	4
